# Supplementary material for: Bifunctional bis(2-carboxyethyl)isocyanurate crystal for high-performance photocatalytic degradation of rose bengal dye and luminescence sensing of PO43−, NO3−, Cl−, Cr2O72− and F− ions
Source: Royal Society of Chemistry journal article supplement (doi:10.1039/d2ce01387h), 2022-11-21
Supplement: d2ce01387h1.pdf [file d2ce01387h1.pdf]

# Bifunctional Bis(2-carboxyethyl)isocyanurate Crystal for High-Performance Photocatalytic Degradation of Rose Bengal Dye and Luminescent Sensing of $\text{PO}_4^{3-}$ , $\text{NO}_3^-$ , $\text{Cl}^-$ , $\text{Cr}_2\text{O}_7^{2-}$ and $\text{F}^-$ ions

Priyanka Singh<sup>a</sup>, Musheer Ahmad<sup>b</sup>, Kafeel Ahmad Siddiqui<sup>a</sup>

<sup>a</sup>Department of Chemistry, National Institute of Technology Raipur,  
G E Road Raipur – 492010, Chhattisgarh, India

<sup>b</sup>Department of Applied Chemistry, Faculty of Engineering and Technology, Aligarh Muslim University,  
Aligarh, UP (India) - 202002

<sup>a</sup> e-mail: [kasiddiqui.chy@nitrr.ac.in](mailto:kasiddiqui.chy@nitrr.ac.in)

**Table S1.** Structure and electrical property of used dyes.

| S.No.           | Dye            | Dye Structure                                                                        | $\lambda_{\text{max}}$ (nm) |
|-----------------|----------------|--------------------------------------------------------------------------------------|-----------------------------|
| <b>Cationic</b> |                |                                                                                      |                             |
| 1.              | Crystal Violet | 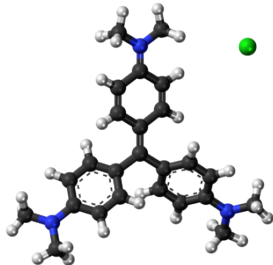   | 590.67                      |
| 2.              | Methyl Violet  |  | 589.49                      |
| 3.              | Methylene Blue |  | 662.63                      |

|                |                    |                                                                                     |        |
|----------------|--------------------|-------------------------------------------------------------------------------------|--------|
| 4.             | Rhodamine 6G       |   | 525.31 |
| <b>Anionic</b> |                    |                                                                                     |        |
| 2.             | Rose Bengal        |    | 549.44 |
| 3.             | Eriochrome Black T |   | 529.23 |
| 4.             | Congo Red          |  | 497.82 |

**Table S2.**Hydrogen bonding parameters for KA@PS (Å) and (°)

| D–H···A            | d(D···H) | d(H···A) | <(D–H···A) |
|--------------------|----------|----------|------------|
| N(2)–H(2)···O(1)#1 | 0.860    | 1.912    | 180        |
| O(3)–H(3)···O(4)#2 | 0.820    | 1.858    | 159.56     |

Symmetry transformations used to generate equivalent atoms: #1  $x, -1+y, z$ ; #2  $\frac{1}{2}-x, -1/2-y, 1-z$ .

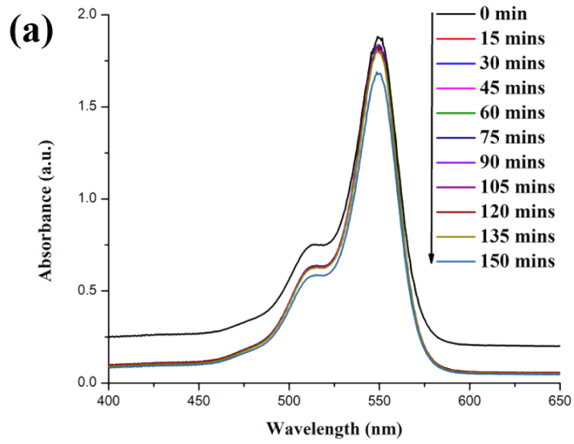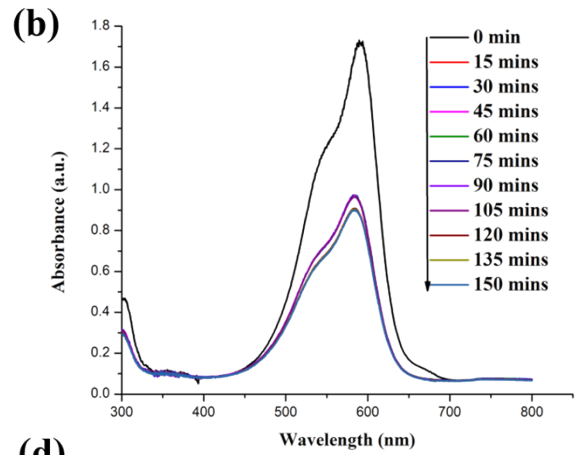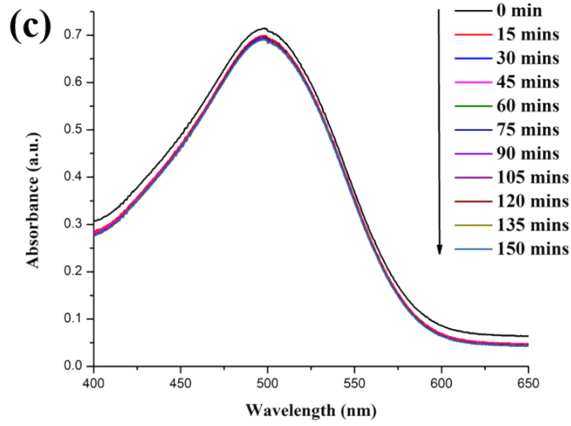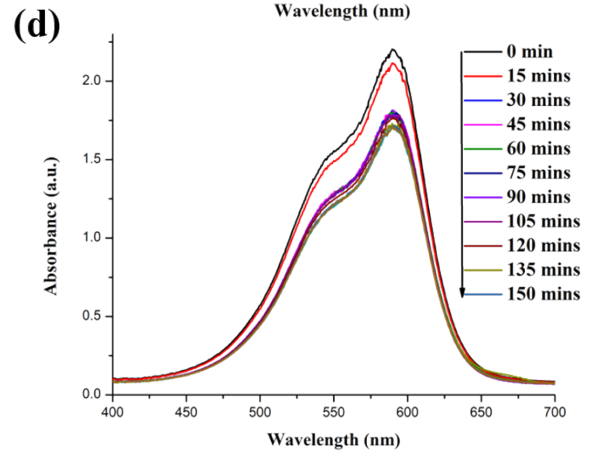

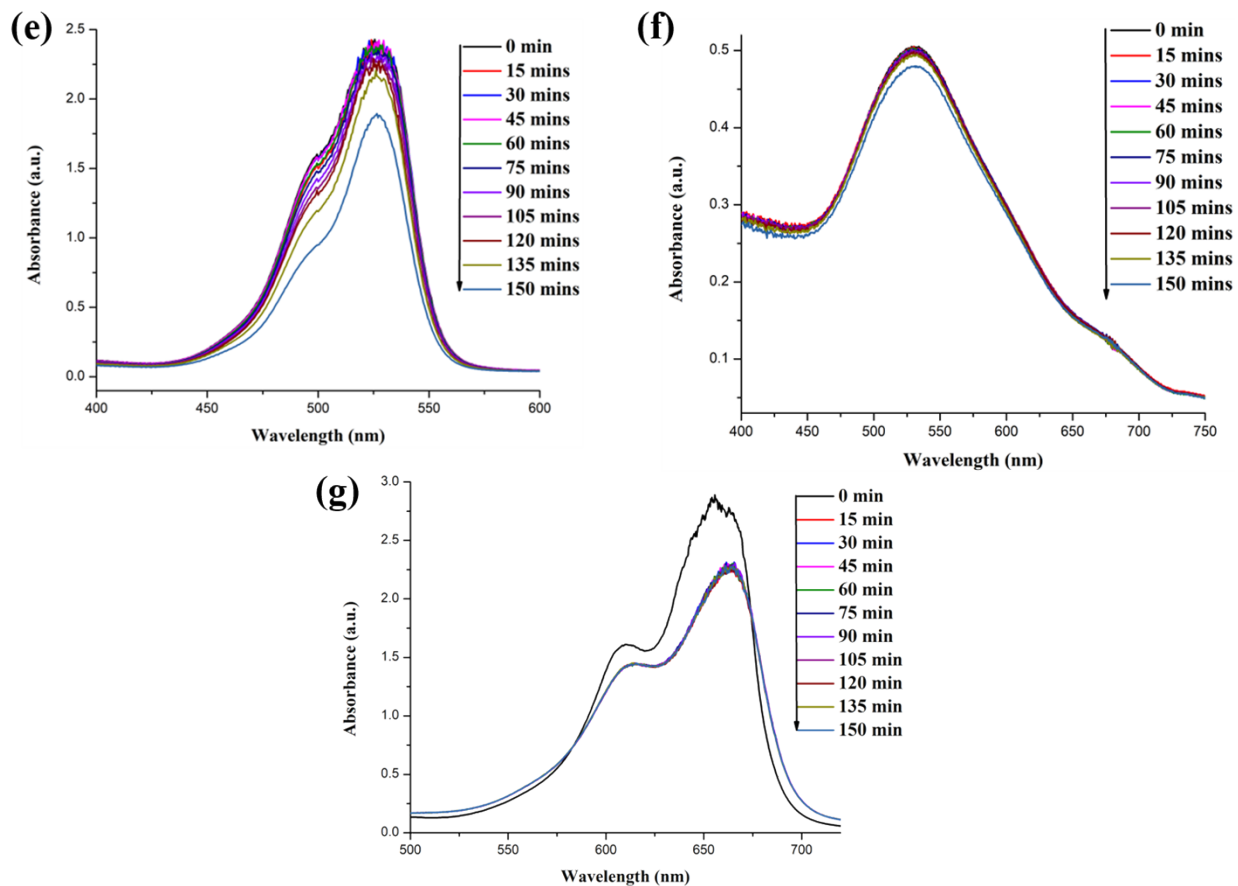

**Figure S1:** UV-visible spectra of the blank RB (a), MV (b), CR (c), CV (d), Rh6G (e), EBT (f) and MB (g) from aqueous solution at several time intervals.

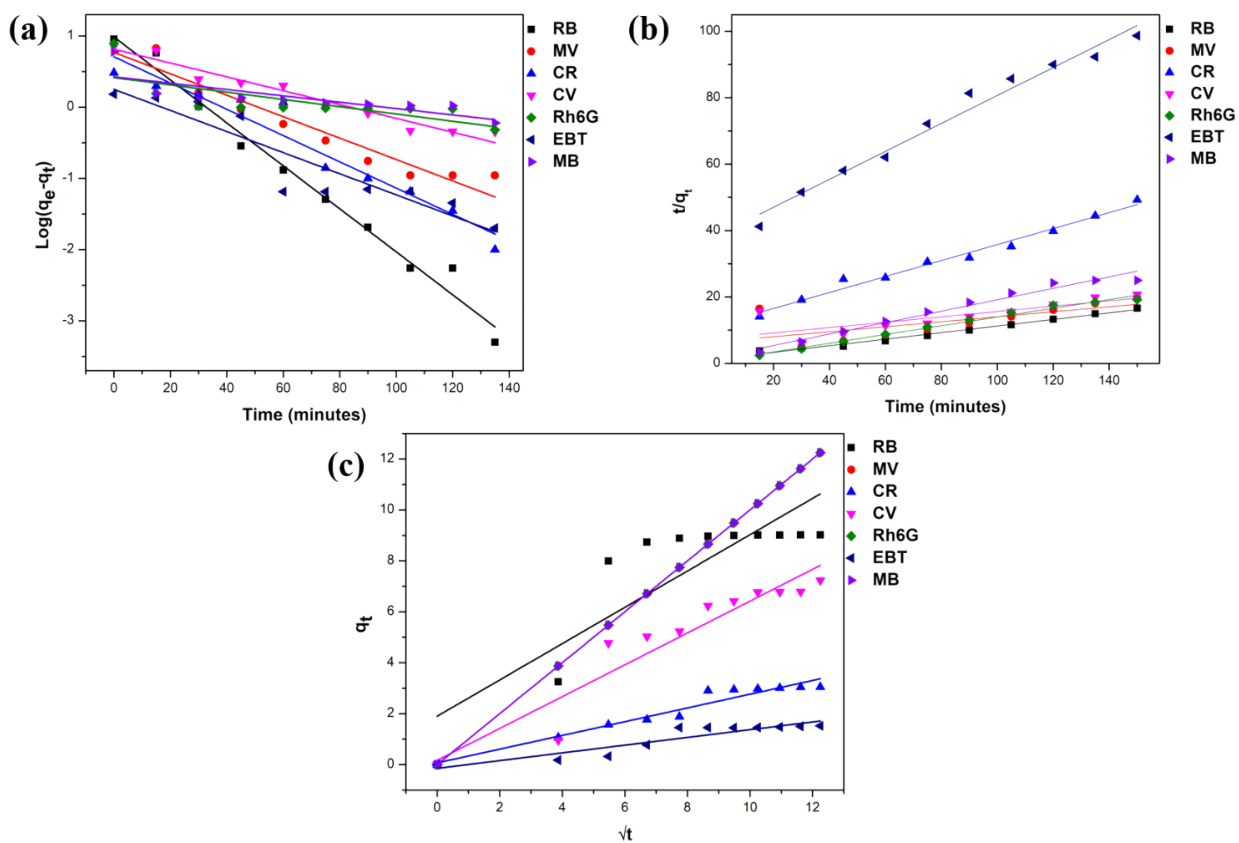

**Figure S2.** Adsorption kinetic plots of RB, MV, CR, CV, Rh6G, EBT and MB on KA@PS representing pseudo-first order kinetics (a); pseudo-second order kinetics (b) and intraparticle diffusion (c).

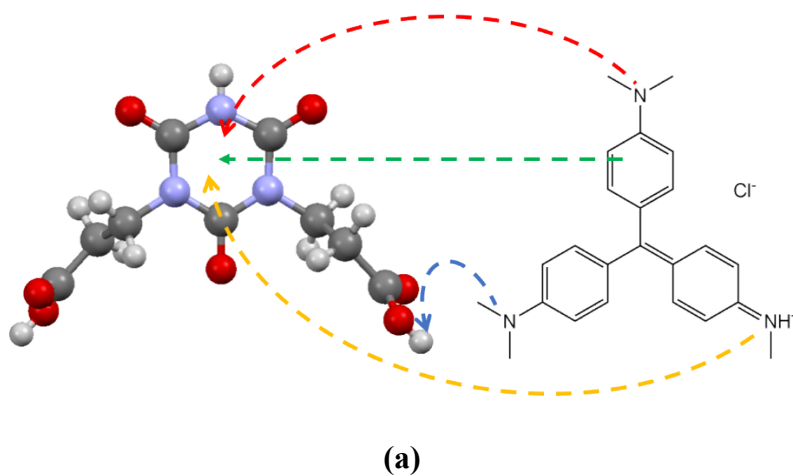

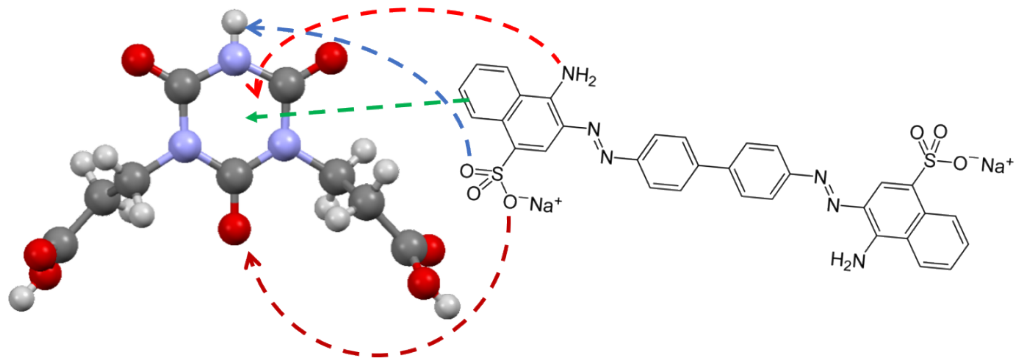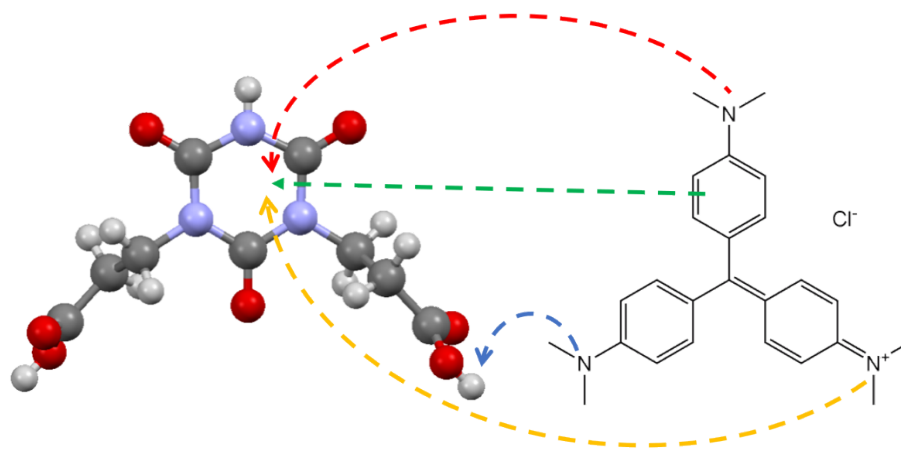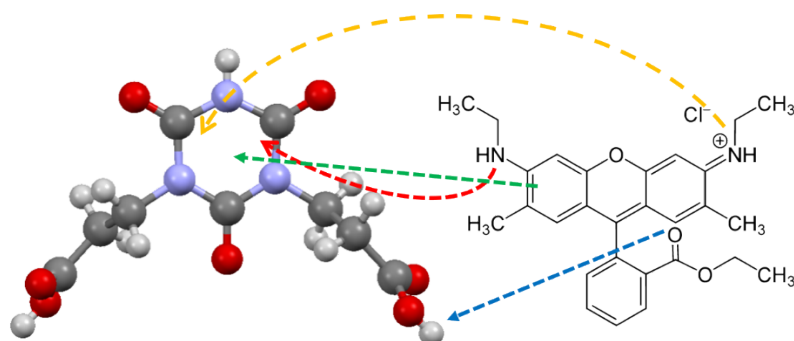

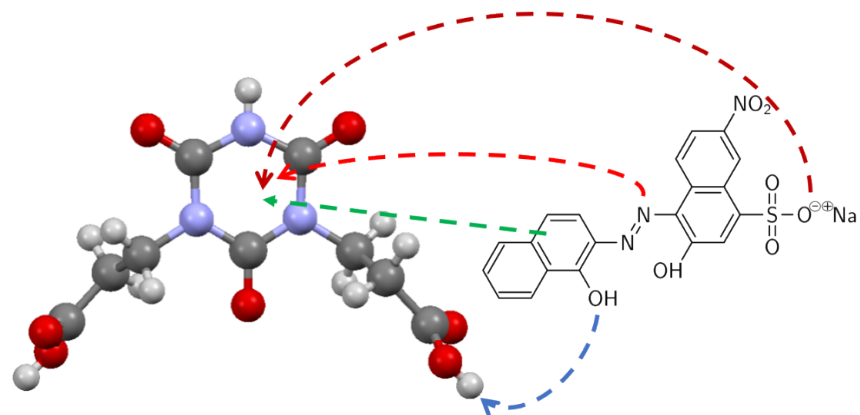

(e)

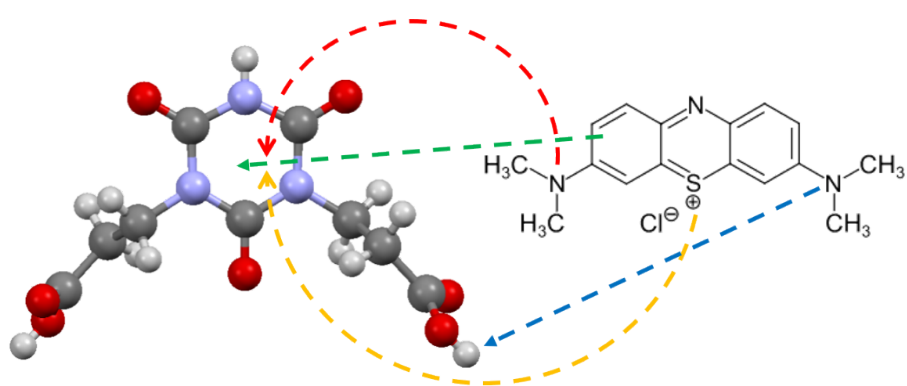

(f)

- - - - - Hydrogen bonding
- - - - - n- $\pi$  bonding
- - - - -  $\pi$ - $\pi$  bonding
- - - - - Electrostatic repulsion
- - - - - Electrostatic attraction

**Figure S3:** The possible mechanism of dye adsorption among (a)MV,(b) CR,(c) CV,(d)Rh6G,(e) EBT, (f)MB andKA@PS .

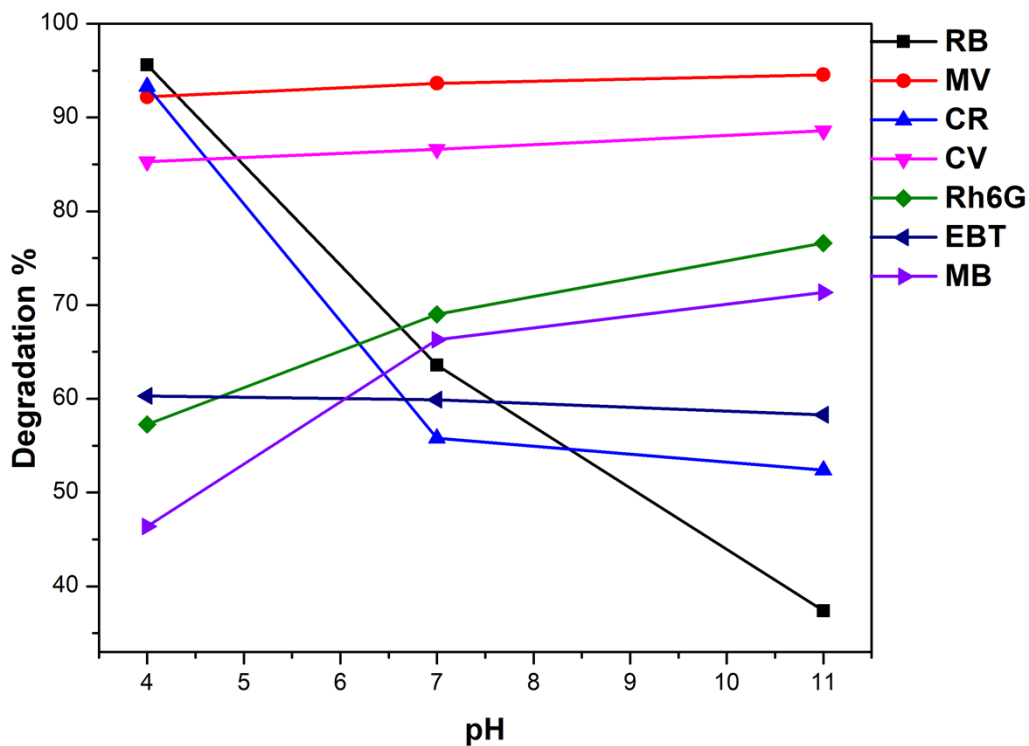

Figure S4. pH effect of KA@PS on RB, CV, CR, CV, Rh6G, EBT and MB.

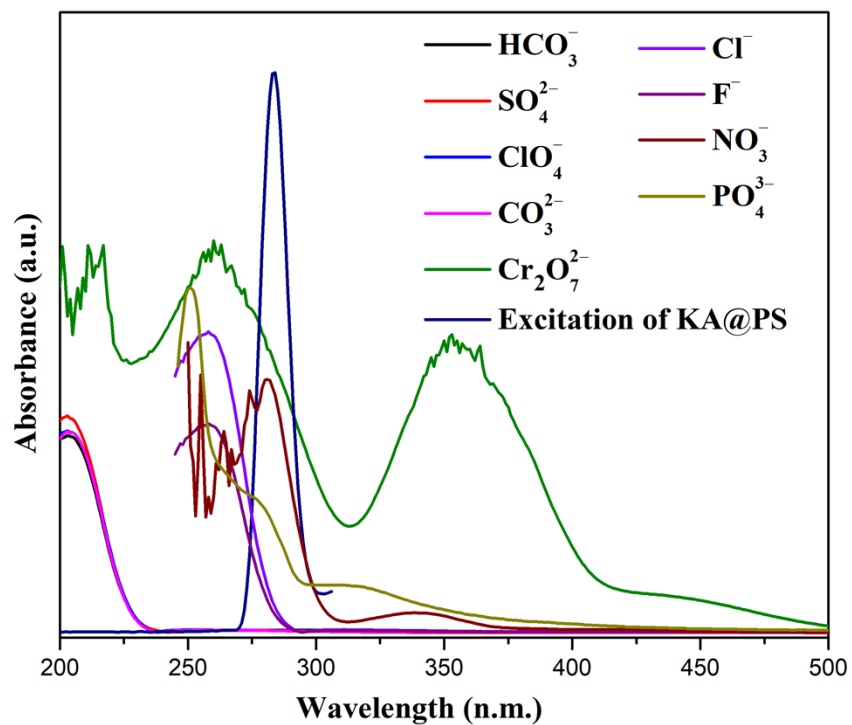

Figure S5: Spectral overlap between the UV-Vis absorption spectra of various anions and the excitation spectra of KA@PS



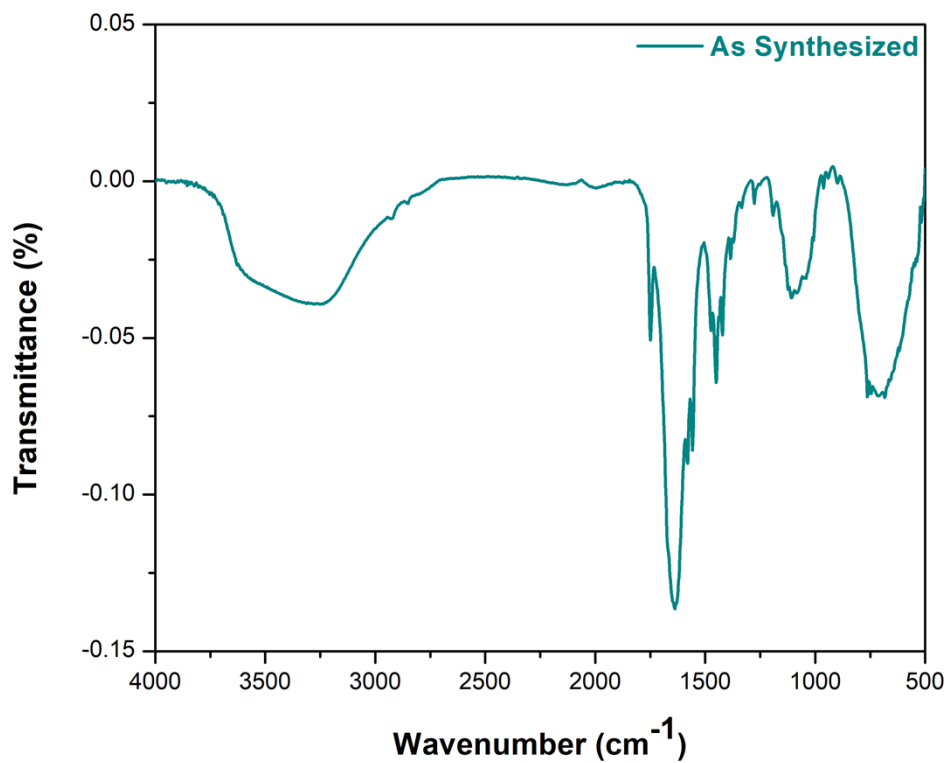

Figure S6. FT-IR of KA@PS.

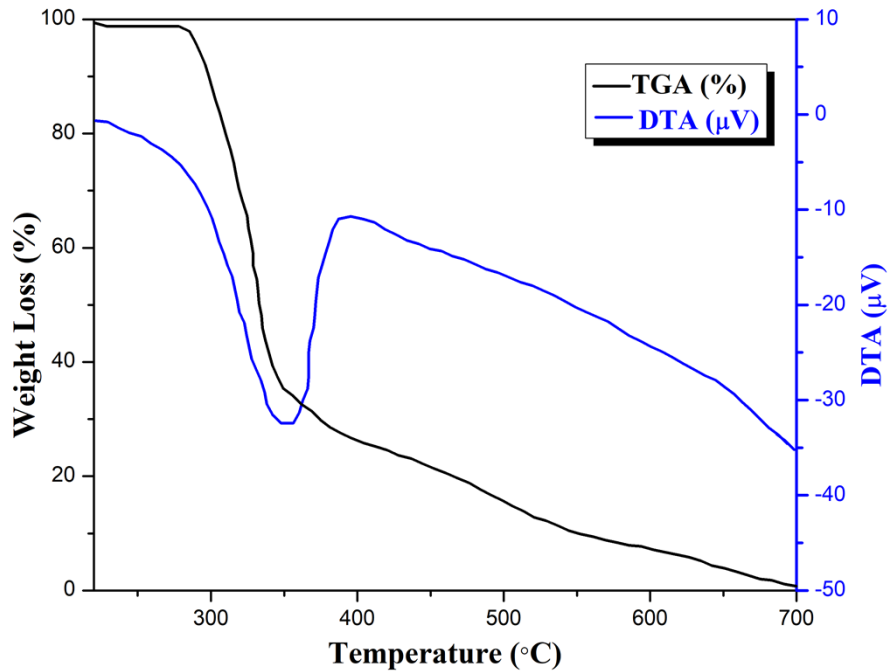

Figure S7. TG/DTA of KA@PS .

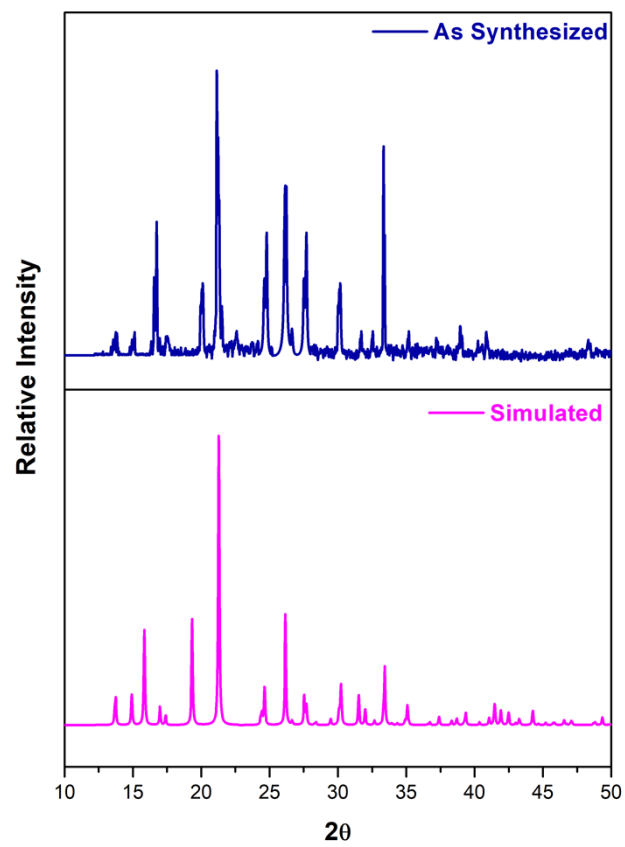

**Figure S8.** PXR D of KA@PS .
